# Supplementary material for: A superhydrophobic and anti-corrosion strain sensor for robust underwater applications
Source: Royal Society of Chemistry journal article supplement (doi:10.1039/d1ta04259a), 2021-01-01
Supplement: d1ta04259a2.pdf [file d1ta04259a2.pdf]

1  
2  
3  
4  
5  
6  
7  
8  
9  
10  
11  
12  
13  
14  
15  
16  
17  
18  
19  
20  
21  
22  
23  
24  
25  
26  
27  
28

## Electronic Supporting Information

*for*

### Superhydrophobic and Anti-corrosion Strain Sensor for Robust Underwater Applications

Ziyi Dai, Sen Ding, Ming Lei, Shunbo Li, Yi Xu, Yinning Zhou,\* and Bingpu Zhou\*

Z. Dai, S. Ding, M. Lei, Prof. Y. Zhou, Prof. B. Zhou

Joint Key Laboratory of the Ministry of Education, Institute of Applied Physics and Materials Engineering, University of Macau, Avenida da Universidade, Taipa, Macau 999078, China

E-mail: [ynzhou@um.edu.mo](mailto:ynzhou@um.edu.mo), [bpzhou@um.edu.mo](mailto:bpzhou@um.edu.mo)

Prof. S. Li, Prof. Y. Xu

Key Laboratory of Optoelectronic Technology and Systems, Ministry of Education & Key Disciplines Laboratory of Novel Micro-Nano Devices and System Technology, College of Optoelectronics Engineering, Chongqing University, Chongqing 400044, China

Prof. B. Zhou

Department of Physics and Chemistry, Faculty of Science and Technology, University of Macau, Avenida da Universidade, Taipa, Macau 999078, China

## 29 **Table of Contents**

|    |                                              |    |
|----|----------------------------------------------|----|
| 30 | <b>1. Supplementary Video Captions</b> ..... | 3  |
| 31 | <b>2. Supplementary Methods</b> .....        | 8  |
| 32 | <b>3. Supplementary Figures</b> .....        | 10 |
| 33 | <b>4. Supplementary Tables</b> .....         | 20 |
| 34 | <b>5. Supplementary References</b> .....     | 22 |

35

36

37

38

39

40

41

42

43

44

45

46

## 47 **1. Supplementary Video Captions**

48 **Video S1: Real-time record of droplet impact test.** The video records the water droplet impact  
49 on the surface of the SHSS under the released status ( $\varepsilon = 0\%$ ). The SHSS was decorated with  
50 microcilia array and swelled by CBNPs and silica nanoparticles before the impact test. The  
51 impinging velocity of the 10  $\mu\text{L}$  water droplet was  $\sim 0.63 \text{ m s}^{-1}$  via freely releasing from a height  
52 of 2 cm. A complete droplet bounce was observed without any liquid residual on the sensor surface.  
53 The video was sped down by 50 $\times$  for replay (i.e. 1 s in the video equals 20 ms in real-time).

54 **Video S2: Comparison of droplet impact test.** As a comparison, the video records the water  
55 droplet impact on the surface of pure microcilia and the microcilia swelled by CBNPs only. The  
56 impinging velocity of the 10  $\mu\text{L}$  water droplet was  $\sim 0.63 \text{ m s}^{-1}$  via freely releasing from a height  
57 of 2 cm. When the droplet impinged on the surface decorated with pure microcilia, an instant  
58 droplet pinning was observed (the left panel of the video). For the substrate decorated with  
59 microcilia array and swelled with CBNPs only, the droplet could easily rebound thanks to the low  
60 adhesive property. However, the rebound of the droplet carried some of the CBNPs from the  
61 surface that were loosely adhered to the substrate (see **Figure S4** for details also). The video was  
62 sped down by 50 $\times$  for replay (i.e. 1 s in the video equals 20 ms in real-time).

63 **Video S3: Self-cleaning capability of the SHSS.** The SHSS was firmly attached to a wood wedge.  
64 The insoluble stearic acid particles with larger particle size (left panel) and soluble, small sodium  
65 chloride (right panel) particles were loaded to the sample surface as the dirt. With continuous water  
66 droplet flushing, all loaded particles can be quickly removed from the surface without residual.  
67 After the removal of the particles, the surface still preserves the excellent water repellency without  
68 obvious decay.

69 **Video S4: High-speed water jet test on SHSS.** The video records the complete reflection of a  
70 high-speed water jet from the surface of SHSS. A water jet with a constant speed of  $11 \text{ m s}^{-1}$  was  
71 generated by setting the volumetric flow rate of  $60 \text{ ml min}^{-1}$  on a syringe pump (Harvard  
72 Apparatus, USA). The water jet was applied through a steel pipe with the diameter (D) of  $\sim 350$   
73  $\mu\text{m}$ . The outlet of the steel pipe was fixed with a vertical distance of 2 mm to the film surface that  
74 was under evaluation. According to above parameters, the Weber number is  $\sim 580$  (see  
75 **Supplementary Methods** for the calculation of Weber number).

76 **Video S5: Flexible SHSS with robust superhydrophobicity.** The SHSS with the dimension of  
77 5 cm $\times$ 5 cm was attached to the palm of a volunteer. The demonstration showed the water  
78 repellency was maintained after various mechanical deformations, e.g. rubbing, compressing, and  
79 squeezing, to the SHSS. The SHSS was also completely immersed into the 0.9% NaCl solution,  
80 where we could clearly observe the silver mirror effect and a completely non-wetted surface was  
81 preserved.

82 **Video S6: Stability of the SHSS in NaCl solution.** The SHSS was attached to the inner wall of a  
83 water tank and completely immersed under the 0.9% NaCl solution. A digital multimeter was  
84 connected to the terminals of the sensor to measure the electrical resistance in real-time. During  
85 the evaluation, periodical finger pressing and rubbing were applied to the surface of the sensor.  
86 The video showed that during the finger pressing/rubbing, a silver mirror was existent over the  
87 sensor surface, indicating the trapped air layer as well as the preserved superhydrophobicity.  
88 Furthermore, after 20 cycles' finger pressing/rubbing, the electrical resistance remained almost  
89 unchanged. The results confirm that the SHSS is possible to work without interference from the  
90 aqueous surroundings.

91 **Video S7: Superhydrophobic robustness against mechanical damage.** The preservation of  
92 superhydrophobicity after various mechanical evaluations such as steel wire ball and scalpel  
93 abrasion was demonstrated in this video. During the evaluation, the SHSS was fixed on a miniature  
94 commercial pressure sensor to record the loaded force in real-time. After the mechanical abrasion,  
95 the water jet can still be completely reflected from the surface, which indicates that the capability  
96 of water repellency is well preserved.

97 **Video S8: Stability of the SHSS against the organic solvent.** In this video, we demonstrated the  
98 superhydrophobic and electrical stability of the sensor (dimension of 5 cm $\times$ 5 cm) when exposed  
99 to contamination by the organic solvent. The electrical resistance rose significantly when the  
100 sensor was wetted by alcohol (95%). However, the resistance returned to the original value after  
101 complete evaporation of the alcohol. We also noticed that the water repellency was not affected  
102 by the wetting of alcohol. After complete evaporation of alcohol, the water jet can still be  
103 completely reflected from the surface of the sensor without any liquid residual. The video

104 convinces the robustness of the as-prepared device in terms of superhydrophobicity and electrical  
105 property.

106 **Video S9: Superhydrophobicity in high temperature water bath.** The video recorded the  
107 overall silver mirror effect when the SHSS was completely immersed in the water bath with high  
108 temperature of  $\sim 98.6$  °C. After taking out from the water bath, it was observed that no liquid was  
109 adhering on the surface. The water jet impact with complete rebound further indicates the  
110 preservation of water repellency after the immersion in water with a high temperature.

111 **Video S10: Impact of continuous tap water flushing on the electrical stability and durability**  
112 **of superhydrophobic.** Real-time record of the resistance variation of the SHSS with a dimension  
113 of  $5\text{ cm} \times 3\text{ cm}$  when the water column (diameter of  $\sim 12$  mm) was continuously impinging on the  
114 surface. A tap water jet with a constant speed of  $1.87\text{ m s}^{-1}$  and Weber number of 574 was generated  
115 via setting a volumetric flow rate of  $4\text{ l min}^{-1}$ . The video shows that under the water jet impact for  
116 nearly half a minute, the electrical resistance of the SHSS remains unaffected. It can also be  
117 observed that no liquid was pinning on the surface during the tap water flushing process, indicating  
118 the robust superhydrophobicity.

119 **Video S11: Real-time record of the resistance stability of SHSS in air or water.** The dimension  
120 of the sensor is about  $2.8\text{ cm} \times 5\text{ cm}$ . The insulated SHSS on both ends of the wire is gradually  
121 immersed from the air environment into the 0.9% NaCl solution, where the resistance of SHSS  
122 does not change significantly during this process. When the sensor was immersed in the NaCl  
123 solution, a silver mirror was observed, which contributed to the reduced contact area between the  
124 ionic solvent and the sensor surface to render the stability of the electrical resistance. We also  
125 noticed that when the conductive clips were in contact with the NaCl solvent, an obvious resistance  
126 decrease occurred. This might be attributed to the electrical conductance increase induced by the  
127 ionic solvent when in contact with the clips (circled in yellow in the video). The video confirms  
128 that the as-prepared sensor possesses excellent electrical stability without the requirement of  
129 additional insulating or encapsulation layer.

130 **Video S12: Influence of water jet during the strain sensing.** In the video, a linear stretching to  
131 150% was periodically applied to the SHSS. During the measurement process, a liquid jet was  
132 applied to the SHSS surface using a syringe needle. Here, we maintained the liquid injection with

133 a relatively small impinging force to avoid the film deformation by the water jet that might finally  
134 result in the resistance variation. The complete rebound of the water jet indicated that the surface  
135 superhydrophobicity was maintained during the strain testing process. Furthermore, the measured  
136 sensing curve was not obviously affected by the water jet, which convinced that the strain sensor  
137 possessed the excellent water repellency to render a stable and reliable signal readout.

138 **Video S13: Strain sensing in air and underwater.** In this video, the SHSS was attached to the  
139 index finger of a volunteer. The finger bending resulted in the increase of electrical resistance, and  
140 the bending duration could be reflected from the signal variations. Furthermore, when the sensor  
141 was completely immersed in water, the finger bending could still lead to the electrical resistance  
142 variation. The results confirmed that the underwater application would not bring unexpected  
143 interference and a reliable signal could be well obtained. After removing from the water tank, a  
144 superhydrophobic surface could be preserved without the liquid pinning.

145 **Video S14: Morse code transmission based on SHSS underwater.** The SHSS was attached to  
146 the index finger joint of a volunteer, and both electrical terminals were connected with a circuit  
147 that was designed for Morse code conversion and Bluetooth transmission. When the finger was  
148 bent, the peripheral circuit would recognize the increased resistance as the signal source. In  
149 principle, we defined the bending duration of  $< 2$  s as the ‘dot’ for Morse code, otherwise a ‘dash’  
150 code would be generated correspondingly. The programmed software on the mobile phone can  
151 convert the transmitted Morse code signal into readable language. See **Methods** in the main text  
152 for the detailed design principle of the circuit and software design. The successful transmission of  
153 serial code ‘SOS’ indicates the potential of the SHSS as wearable sensor or signal emitter for  
154 underwater applications.

155 **Video S15: Real-time record of the Morse code communication under high-speed water**  
156 **impact.** The SHSS was attached to the finger of a research volunteer. Based on the finger bending,  
157 the duration can be controlled and applied to define the signal of ‘dot’ and ‘dash’ for Morse code  
158 generation. Two different volumetric rates, and thus the impact velocities, were applied to evaluate  
159 the stability of the SHSS. The tap water jets with constant speeds of  $3.4 \text{ m s}^{-1}$  and  $5.38 \text{ m s}^{-1}$  were  
160 generated, with the spot diameter (D) of  $\sim 8$  mm. According to above parameters, the Weber  
161 number is 1266.5 and 3137.7 for the water jet impact in this video.

162 To obtain the peak force of the water jet, a miniature pressure sensor (ZQ-21A, ZHIQU Precision  
163 Instruments) was placed directly under the water column to monitor the real-time impact force  
164 from the water jet to the film surface. During the testing process, the maximum recorded impact  
165 force was 1.93 N. Consequently, the peak pressure was derived as ~38.4 kPa. It can be observed  
166 that under the water jet impact, the Morse code ‘SOS’ can still be stably produced without liquid  
167 interference. Furthermore, the video showed the complete water rebound when the high-speed  
168 water jet was impacting on the surface of the SHSS, indicating the excellent water repellency of  
169 the as-prepared SHSS.

170

171

172

173

174

175

176

177

178

179

180

181

182

183

## 184 **2. Supplementary Methods**

### 185 **2.1 Derivation criterion of the device conductivity**

186 Apart from the monitoring of resistance variation, in this work we also applied the conductivity  
187 ( $\sigma$ ) to evaluate the electrical stability of the SHSS when exposed to sorts of mechanical and  
188 chemical tests. In principle, the conductivity is an electrical parameter used to describe the ease of  
189 charge flow in a substance. The standard unit of conductivity  $\sigma$  is Siemens per meter ( $S\ m^{-1}$ ), which  
190 is the reciprocal of resistivity  $\rho$ , that is,  $\sigma = 1/\rho$ .

191 The electrical resistance, which can be directly measured by the digital multimeter during the  
192 evaluation process, is represented by:

$$193 \quad R = \frac{\rho l}{A}$$

194 And we thus have:

$$195 \quad \rho = \frac{RA}{l}$$

196 where  $R$  is the measured resistance,  $A$  is the cross-sectional area, and  $l$  is the length of the sensor  
197 under evaluation. We finally obtain the value of the conductivity as

$$198 \quad \sigma = \frac{l}{RA}$$

199 With the above formula, the conductivity from a specific SHSS can be monitored depending on  
200 the measured resistance and the dimensional parameters of the device under investigation. For  
201 example, for a SHSS with length ( $l$ ) of 5 cm, cross-sectional area ( $A$ ) of  $1\ cm^2$  (200  $\mu m$ ), and  
202 recorded resistance of  $\sim 30\ k\Omega$ , the resultant conductivity is  $\sim 0.83\ S\ m^{-1}$ .

### 203 **2.2. Calculation of the Weber number**

204 The Weber number ( $We$ ) is applied to define the ratio of the fluid's inertia when compared with  
205 the surface tension during the impact test from tap water jet. For the Weber number in this study,  
206 it can be written as



207  $We = \frac{\rho v^2 l}{\sigma}$

208 where  $\rho$  is the fluid density (997 kg m<sup>-3</sup>),  $v$  is the velocity,  $l$  is the characteristic length, and  $\sigma$  is the  
209 surface tension of water under room temperature (72.75 mN m<sup>-1</sup>). Herein,  $l$  was considered the  
210 same as the diameter of the water column where impinging on the surface of the SHSS. To  
211 determine the impact velocity of the water jet on the film, we used a container to collect the  
212 inbound water at the same level within a specific period,  $T$ . With the measured volume ( $V$ ) of  
213 collected water, the impact velocity was roughly calculated as

214  $v = \frac{V}{\pi \cdot \left(\frac{l}{2}\right)^2 \cdot T}$

215 The Weber number can thus be obtained based on the two formulas above.

216

217

218

219

220

221

222

223

224

### 225 3. Supplementary Figures

226

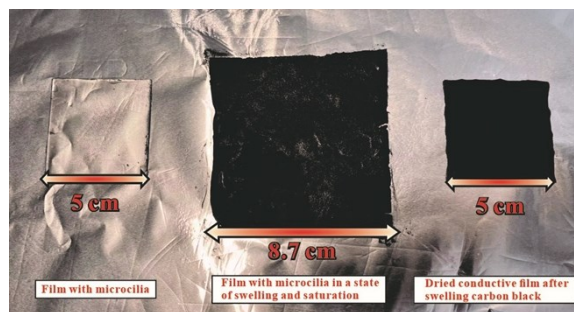

227 **Figure S1.** Optical images of the microcilia decorated PDMS film before the swelling process (a);  
228 swelled by CBNPs (b); and dried after the swelling process of (c).

229 The optical images indicate that the swelling process leads to the obvious area variation of the as-  
230 prepared film. During this process, it is thus positive for the nanoparticle (CBNPs) penetration into  
231 the PDMS matrix. However, after the complete evaporation of the solvents, the area recovered to  
232 the initial status before the swelling process. Furthermore, the film color from transparent to  
233 completely black convinces the successful penetration of CBNPs onto the PDMS matrix which  
234 enables the conductive path for strain sensing.

235

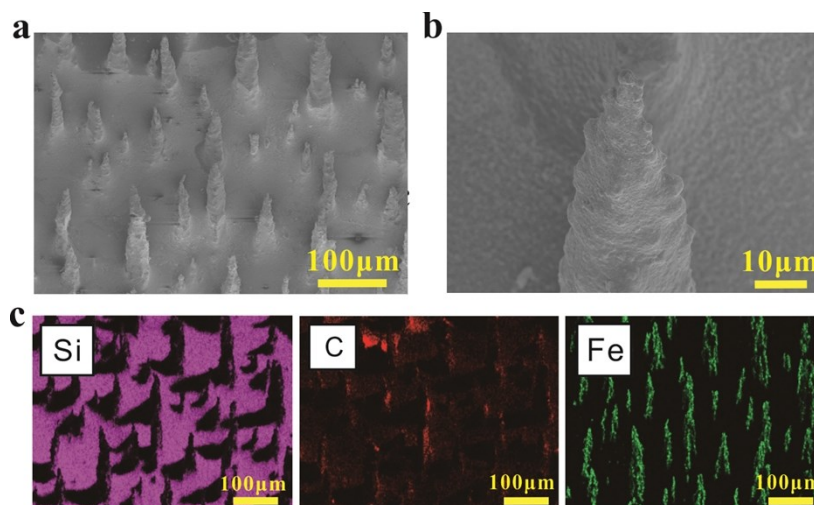

236 **Figure S2.** SEM images of (a) The sensor surface for element mapping analysis (EDS) and (b) A  
237 typical microcilia after the swelling process of CBNPs and silica nanoparticles. (c) EDS element  
238 mapping results of Si, C, and Fe, respectively.

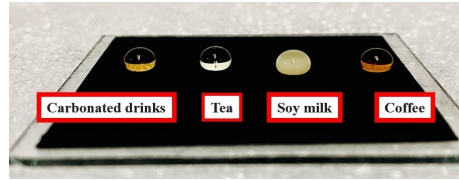

239

240 **Figure S3.** Optical image of the SHSS, with the droplets of carbonated drinks, green tea, soy milk,  
241 and coffee. Due to the superhydrophobic surface property, the droplets were resident on top of the  
242 SHSS and maintained the spherical shapes without spreading. The volume of all droplets loaded  
243 on the SHSS surface is 20  $\mu\text{L}$ .

244

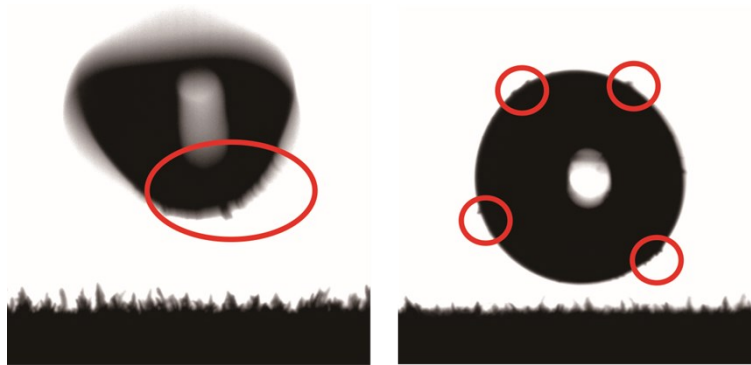

245

246 **Figure S4.** Optical images of the droplet rebound (10  $\mu\text{L}$ ) on the PDMS surface. The sample has  
247 been decorated with microcilia array and swelled by CBNPs using the standard process as  
248 indicated in the main text.

249 The parts circled in red indicate that the surface of the droplet is covered with CBNPs after contact  
250 with the surface. Compared with the phenomenon mentioned in the main text (**Figure 1e**), the  
251 second step of swelling process thus decorates the silica nanoparticles and removes the loosely  
252 adhered CBNPs from the substrate at the same time.

253

254

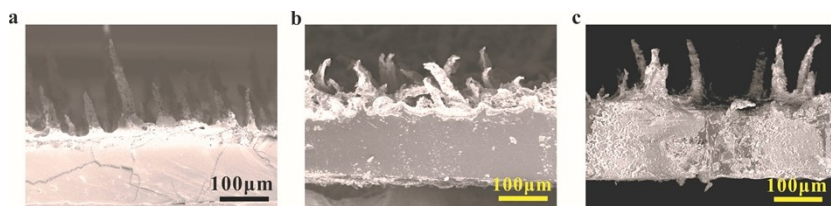

255

256 **Figure S5.** Cross-sectional SEM images of (a) the as-prepared microcilia structures; (b) the  
 257 microcilia structures after CBNPs swelling process in alcohol condition; and (c) the microcilia  
 258 structures after CBNPs swelling process in cyclohexane condition.

259 The cross-section was obtained via cutting the sample using a scalpel, which thus provided us the  
 260 direct observation about the nanoparticle penetration results into the PDMS matrix. As confirmed  
 261 from the SEM images, the swelling process in cyclohexane led to the successful penetration of  
 262 CBNPs into the matrix, which finally enabled the conductive path throughout the substrate for  
 263 strain sensing.

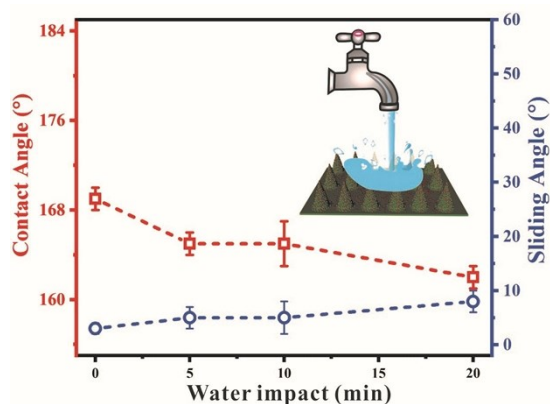

264

265 **Figure S6.** Variations of the contact angle ( $\theta_{CA}$ ) and sliding angle ( $\theta_{SA}$ ) of the SHSS when exposed  
 266 to continuous tap water flushing with duration up to 20 min. See **Methods** for detailed setup and  
 267 parameters. The error bars were obtained from distinct measurements via randomly selecting five  
 268 different positions on a typical sample.

269

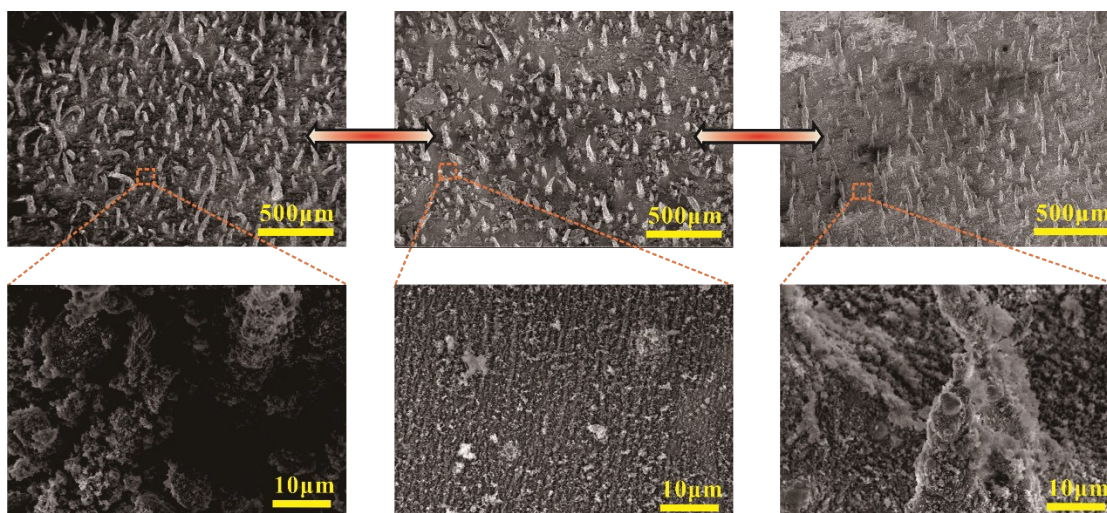

270

271 **Figure S7.** SEM images of the SHSS when exposed to different extents of linear stretching (from  
 272 left to right: 0%, 100%, and 250%). The SEM images in the lower panels are related to the bottom  
 273 areas uncovered by the microcilia. The results indicated that the dense microcilia array were  
 274 formed even under the stretched status, thus leading to the reduced contact area between the loaded  
 275 droplets and the substrate surface to preserve the superhydrophobicity.

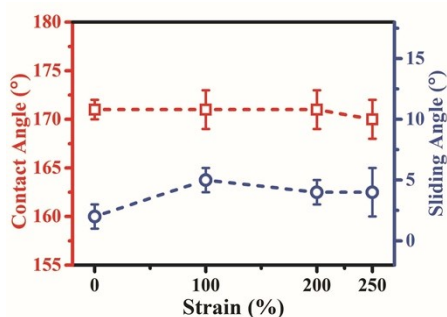

276

277 **Figure S8.** Variations of the contact angle ( $\theta_{CA}$ ) and sliding angle ( $\theta_{SA}$ ) of the SHSS when exposed  
 278 to different extents (100%, 200%, and 250%) of linear stretching.

279 A slight decrease of  $\theta_{CA}$  from 171° to 170° and slight increase of  $\theta_{SA}$  from 2° to 4° were found,  
 280 revealing the preserved superhydrophobicity covering the working spectrum. The error bars were  
 281 obtained from distinct measurements via randomly selecting five different positions on a typical  
 282 sample.

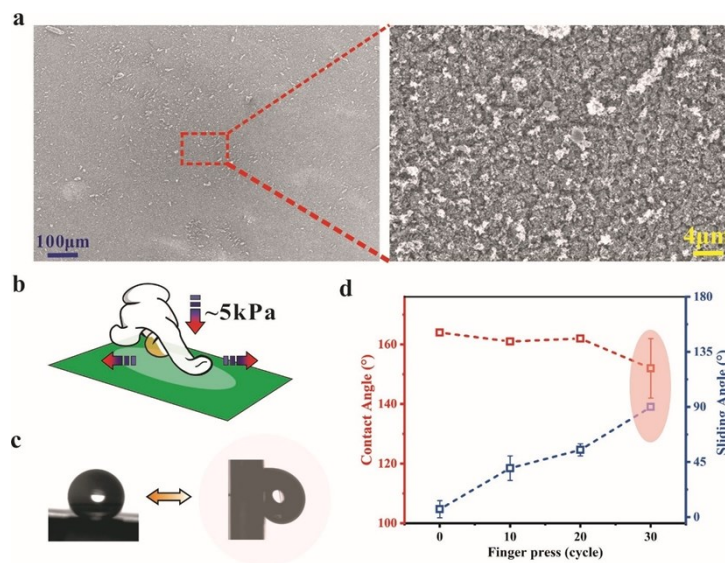

283

284 **Figure S9.** (a) SEM image of the PDMS film without microcilia while swelled with CBNPs and  
 285 silica nanoparticles successively. (b) Schematic diagram of finger press on the film. (c) Droplet  
 286 pinning effect after 30 cycles' finger pressing. (d) Variation of  $\theta_{CA}$  and  $\theta_{SA}$  after cyclic finger press  
 287 with 5 kPa pressure.

288 **Figure S9** provides the results of finger press evaluation on the substrate that has been swelled  
 289 with CBNPs and silica nanoparticles, while without the decoration of microcilia array. Even  
 290 though the surface has been treated with the hydrophobic silica nanoparticles, significant  
 291 degradation was found after only 10 cycles' finger pressing due to the absence of the microcilia.  
 292 After 30 cycles, most regions have lost the capability of water repellency, where the water droplet  
 293 was adhering on the substrate even when the sample has been tilted by 90°. From this perspective,  
 294 the surface without decoration of microcilia was easy to be dramatically destroyed under the  
 295 evaluation of finger pressing, which showed that such surface was not suitable for the reliable and  
 296 practical applications. The results confirm that apart from the silica nanoparticles, the microcilia  
 297 array is also of great significance to maintain the robust superhydrophobicity.

298



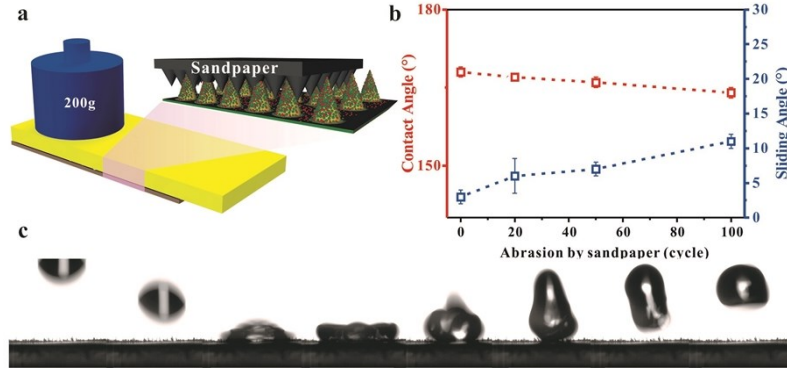

299

300 **Figure S10.** (a) Schematic illustration of the durability test via periodical and lateral mechanical  
 301 abrasion with a commercial sandpaper (grit #1200). (b) Variation of  $\theta_{CA}$  and  $\theta_{SA}$  after cyclic  
 302 sandpaper abrasions with cycles up to 100. (c) Rebound behavior when the 10  $\mu$ L droplet was  
 303 freely released from height of 2 cm towards the surface of the sensor that has been abraded via  
 304 sandpaper for 100 cycles. The time interval between each optical image is 5 ms.

305

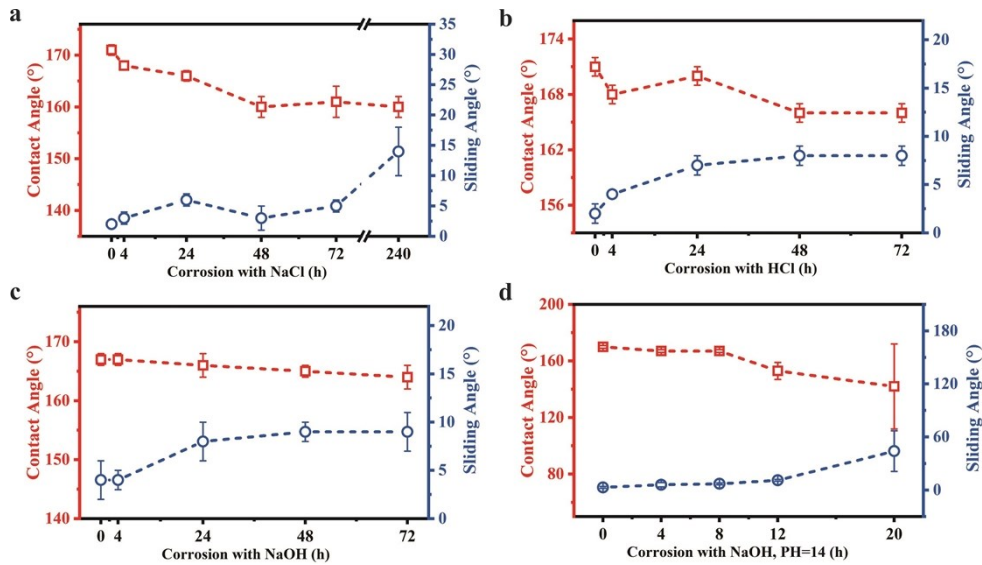

306

307 **Figure S11.** Variations of  $\theta_{CA}$  and  $\theta_{SA}$  of the as-prepared SHSS when immersed in (a) 0.9% NaCl  
 308 solution up to 240 h; (b) HCl solution, PH = 1 up to 72 h; (c) NaOH solution, PH = 12 up to 72 h;  
 309 and (d) NaOH solution, PH = 14 up to 20 h.

310

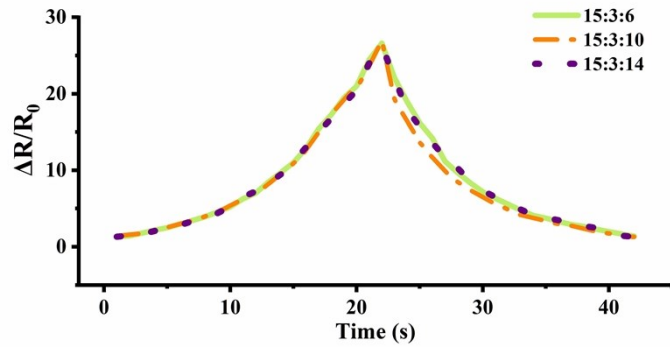

311

312 **Figure S12.** The resistance variation when the SHSS prepared with different CIP ratios was loaded  
 313 with 150% strain and released.

314 Herein, the weight ratio of CIP was adjusted to regulate the morphology of the microcilia array.  
 315 However, the curves indicate that such regulation has insignificant effect on the sensing  
 316 performance, which means that the main conductive path locates in the substrate matrix. From this  
 317 perspective, the microcilia array acts as a protective layer and is mainly responsible for the  
 318 robustness of superhydrophobicity. The main contribution to the conductive path for strain sensing  
 319 locates in the bulk substrate, which enables the electrical stability of the sensor when exposed to  
 320 the surface abrasion.

321

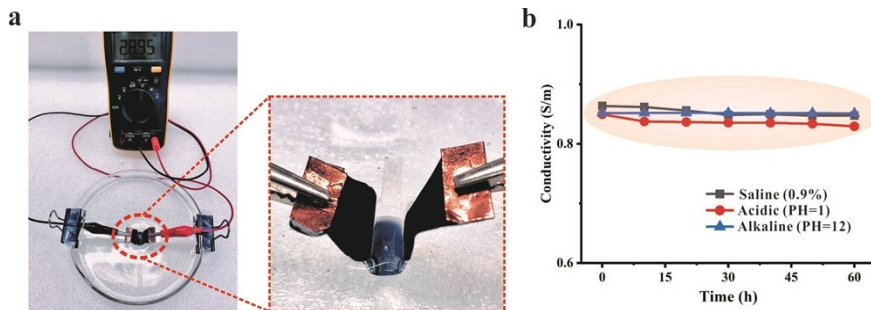

322

323 **Figure S13.** (a) Experimental setup to evaluate the electrical stability of the SHSS when immersed  
 324 in different solvents such as NaCl, HCl, and NaOH. (b) Variation of the conductivity after the  
 325 sensor was immersed in different solvents for duration up to 60 h.

326 To avoid the interference caused by the conductive clips, we fixed the SHSS with a length of 2 cm  
 327 into the solution for evaluation. During the experiment, the digital multimeter was applied to



328 monitor the variation of the electrical resistance in real-time. The curves showed that the SHSS  
 329 possessed the conductivity stability when exposed to the solvent corrosion. Furthermore, the silver  
 330 mirror effect indicated the air pocket layer was successfully formed between the sensor and the  
 331 solvent to guarantee the electrical stability. For the calculation of the conductivity, please refer to  
 332 the **Supplementary Methods**.

333

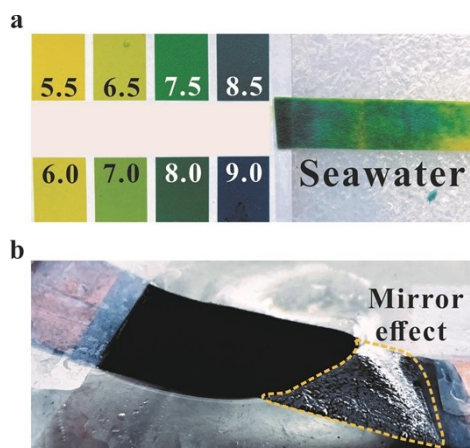

334

335 **Figure S14.** (a) The typical pH value, within the range of 8.0~8.5, of seawater. The seawater was  
 336 taken from the sea area near Macau. (b) The silver mirror effect of the SHSS when immersed into  
 337 the seawater, which indicates the existence of trapped air layer between the liquid and the solid  
 338 surface.

339

| A   | B       | C       | D       | E     | F       | G     | H       | I       | J       | K       | L       | M       |
|-----|---------|---------|---------|-------|---------|-------|---------|---------|---------|---------|---------|---------|
| · - | - · · · | - · - · | - · ·   | ·     | · · - · | - - · | · · · · | · ·     | · - - - | - · -   | · - - - | - -     |
| N   | O       | P       | Q       | R     | S       | T     | U       | V       | W       | X       | Y       | Z       |
| - · | - - -   | · - - · | - - - - | · - · | · · ·   | -     | · · -   | · · · - | · - -   | - · · - | · - - - | - - · · |

340

341 **Figure S15.** Benchmarking table of the Morse code system. The combinations of ‘dot’ and ‘dash’  
 342 signals were well accepted for the definitions of different letters. In this work, the signals of ‘dot’  
 343 and ‘dash’ were generated by controlling the finger bending duration when the sensor was attached  
 344 to the finger joint of the volunteer.

345

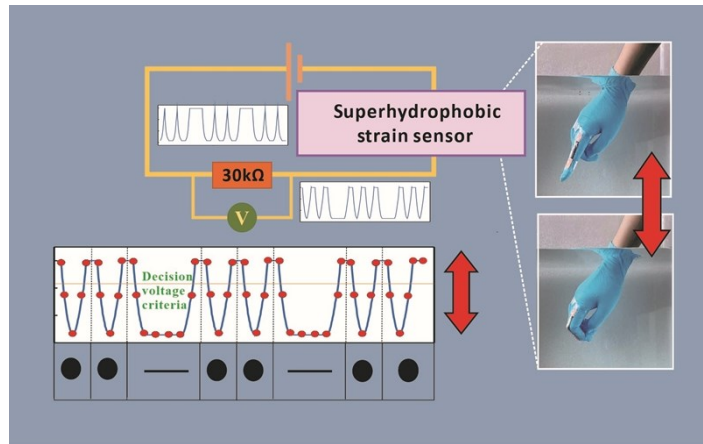

346

347 **Figure S16.** Schematic diagram showing the principle for Morse code generation and conversion  
 348 based on the SHSS.

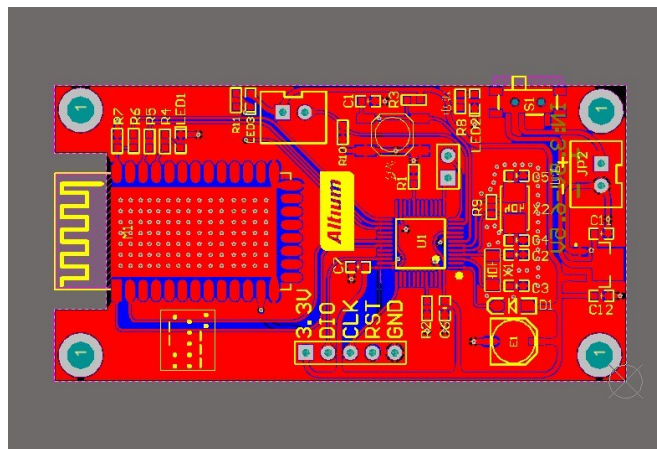

349

350 **Figure S17.** Integrated circuit of Morse code translation and Bluetooth function based on the  
 351 Altium Designer 13.

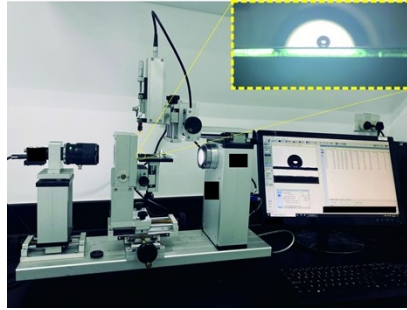

352

353 **Figure S18.** The Optical picture of the optical contact angle and sliding angle measurement  
 354 system. The inset shows the resident water droplet on the sample that is under evaluation.

#### 355 4. Supplementary Tables

356 **Supplementary Table S1.** Consumable cost for the production of SHSS.

| Item                                | Unit Price (USD)     | Consumption | Total Price (USD) |
|-------------------------------------|----------------------|-------------|-------------------|
| PDMS substrate                      | 145 kg <sup>-1</sup> | 0.83 g      | 0.12              |
| PDMS film                           | 145 kg <sup>-1</sup> | 0.48 g      | 0.07              |
| Carbonyl iron particle              | 350 kg <sup>-1</sup> | 0.27 g      | 0.10              |
| Cyclohexane                         | 10 l <sup>-1</sup>   | 70 ml       | 0.7               |
| Silica nanoparticle                 | 350 kg <sup>-1</sup> | 0.2 g       | 0.07              |
| <b>Total Cost (5 cm × 5 cm )</b>    |                      |             | 1.06              |
| <b>Standard SHSS (1 cm × 5 cm )</b> |                      |             | 0.21              |

357 The table (**Table S1**) above shows the rough cost that is required to prepare the superhydrophobic  
 358 strain sensor with dimension of 5 cm × 1 cm in this work. The unit price is based on the  
 359 consumable quotation provided via the local suppliers. Estimated consumable expense is  
 360 considered as the main contribution to account for the cost of production. The consumptions of  
 361 PDMS and carbonyl iron particles also include the parts wasted during the spin-coating process.

362

363

364

365

366

367

368

369

## 370 Supplementary Table

371

| Maximum working strain | Maximum GF | Durability   | Sandpaper abrasion                                        |                    | Water impact |       | Chemical corrosion   |         |                             |                 |                      |                      | Fluorinated          | Underwater test | Ref |     |           |
|------------------------|------------|--------------|-----------------------------------------------------------|--------------------|--------------|-------|----------------------|---------|-----------------------------|-----------------|----------------------|----------------------|----------------------|-----------------|-----|-----|-----------|
|                        |            |              | C*                                                        | S*                 | C            | S     | Acid                 |         | Alkaline                    |                 | Salt                 |                      |                      |                 |     |     |           |
| 100%                   | 10E8       | 1000 (100%)  | 40 cycles @20g                                            | 40cycles @20g      | 45s          | 45s   | X                    | droplet | X                           | droplet         | X                    | droplet              | X                    | droplet         | Yes | No  | [1]       |
| 0.7%                   | 7.5        | 1000 (0.6%)  | X                                                         | X                  | X            | X     | X                    | 48h     | X                           | 48h             | X                    | 48h                  | X                    | 48h             | No  | No  | [2]       |
| 60%                    | 3.6E8      | 2000 (30%)   | 60 cycles @20g                                            | 60cycle @20g       | X            | X     | X                    | X       | X                           | X               | X                    | X                    | X                    | X               | No  | No  | [3]       |
| 100%                   | 242.6      | 1000 (50%)   | 200 cycles @unmarked                                      | 30cycles @unmarked | X            | X     | 8h                   | 8h      | X                           | droplet         | X                    | droplet              | X                    | droplet         | No  | No  | [4]       |
| 300%                   | 13000      | 1000(20%)    | X                                                         | X                  | X            | X     | X                    | X       | X                           | X               | X                    | X                    | X                    | X               | No  | No  | [5]       |
| 100%                   | 0.93       | 700 (50%)    | X                                                         | X                  | X            | X     | 6h                   | 6h      | X                           | droplet         | X                    | droplet              | X                    | droplet         | No  | No  | [6]       |
| 100%                   | 5.9        | 600(50%)     | X                                                         | X                  | X            | X     | 6h                   | droplet | 6h with significant changes | droplet         | 6h                   | droplet              | 6h                   | droplet         | No  | No  | [7]       |
| 80%                    | 0.6        | 5000 (10%)   | 3 cycles @ 3.5 kPa ( $\Delta$ )<br>R/R <sub>0</sub> =150% | X                  | X            | X     | X                    | X       | X                           | X               | X                    | X                    | X                    | X               | No  | Yes | [8]       |
| 170%                   | 1900       | 1000 (40%)   | X                                                         | X                  | X            | X     | X                    | droplet | X                           | droplet         | X                    | droplet              | X                    | droplet         | Yes | No  | [9]       |
| 100%                   | 21         | 1000 (50%)   | X                                                         | X                  | X            | X     | droplet (with decay) | 8h      | droplet (with decay)        | 6h (with decay) | droplet (with decay) | droplet (with decay) | droplet (with decay) | 8h              | Yes | No  | [10]      |
| 200%                   | 21         | 10000(10%)   | 80cycles@500g (with decay)                                | 80cycles@500g      | X            | 200s  | 24h (with decay)     | 24h     | 24h (with decay)            | 24h             | 24h                  | 24h                  | 24h                  | 24h             | Yes | No  | [11]      |
| 250%                   | 276        | 10000 (150%) | 100cycle@200g                                             | 100cycle@200g      | 1200s        | 1200s | 72h                  | 72h     | 72h                         | 72h             | 72h                  | 72h                  | 240h                 | 240h            | No  | Yes | This work |

C: conductivity; S: superhydrophobicity.

## 372 **5. Supplementary References**

- 373 [1] L. Wang, H. Wang, X.-W. Huang, X. Song, M. Hu, L. Tang, H. Xue, J. Gao, *J. Mater. Chem.*  
374 *A*, 2018, **6**, 24523.
- 375 [2] Q. Li, H. Liu, S. Zhang, D. Zhang, X. Liu, Y. He, L. Mi, J. Zhang, C. Liu, C. Shen, *ACS Appl.*  
376 *Mater. Interfaces*, 2019, **11**, 21904.
- 377 [3] L. Wang, J. Luo, Y. Chen, L. Lin, X. Huang, H. Xue and J. Gao, *ACS Appl. Mater. Interfaces*,  
378 2019, **11**, 17774-17783.
- 379 [4] Y. Chen, L. Wang, Z. Wu, J. Luo, B. Li, X. Huang, H. Xue, J. Gao, *Compos. B. Eng.*, 2019,  
380 **176**.
- 381 [5] D. Yao, L. Wu, S. Peng, X. Gao, C. Lu, Z. Yu, X. Wang, C. Li, Y. He, *ACS Appl. Mater.*  
382 *Interfaces*, 2021.
- 383 [6] L. Wang, Y. Chen, L. Lin, H. Wang, X. Huang, H. Xue, J. Gao, *Chem. Eng. J.*, 2019, **362**, 89.
- 384
- 385 [7] J. Gao, B. Li, X. Huang, L. Wang, L. Lin, H. Wang, H. Xue, *Chem. Eng. J.*, 2019, **373**, 298.
- 386 [8] B. N. Sahoo, J. Woo, H. Algadi, J. Lee, T. Lee, *Adv. Mater. Technol.*, 2019, **4**, 1900230.
- 387 [9] J. Lin, X. Cai, Z. Liu, N. Liu, M. Xie, B. Zhou, H. Wang, Z. Guo, *Adv. Funct. Mater.*, 2020,  
388 **30**, 2000398.
- 389 [10] B. Li, J. Luo, X. Huang, L. Lin, L. Wang, M. Hu, L. Tang, H. Xue, J. Gao, Y.-W. Mai,  
390 *Compos. B. Eng.*, 2020, **181**, 107580.
- 391 [11] P. Wang, W. Wei, Z. Li, W. Duan, H. Han, Q. Xie, *J. Mater. Chem. A*, 2020, **8**, 3509.
